# Supplementary material for: The CREST-E study of creatine for Huntington disease: A randomized controlled trial
Source: PubMed Central journal article supplement — Neurology. 2017 Aug 8;89(6):594–601. doi: 10.1212/WNL.0000000000004209 (PMC5562960; doi:10.1212/wnl.0000000000004209), 2017-08-08
Supplement: supp_WNL.0000000000004209_Table_e-1.pdf [file supp_WNL.0000000000004209_Table_e-1.pdf]

Supplement table e-1: Efficacy Models: Treatment/Gender Effects, Adjusted for Baseline Measurement

|                         | Female        |                |                    |                | Male          |                |                    |         |
|-------------------------|---------------|----------------|--------------------|----------------|---------------|----------------|--------------------|---------|
|                         | Placebo Slope | Creatine Slope | Effect of Creatine |                | Placebo Slope | Creatine Slope | Effect of Creatine |         |
|                         | est.(s.e.)    | est.(s.e.)     | est.(s.e.)         | P-value        | est.(s.e.)    | est.(s.e.)     | est.(s.e.)         | P-value |
| Total Function Capacity | -0.58 (0.09)  | -1.00 (0.10)   | -0.42 (0.14)       | <b>0.0028*</b> | -0.83 (0.10)  | -0.59 (0.12)   | 0.24 (0.15)        | 0.1249  |
| Total Motor Scale       | 2.87 (0.58)   | 4.39 (0.65)    | 1.52 (0.87)        | 0.0799         | 3.85 (0.63)   | 2.54 (0.71)    | -1.30 (0.95)       | 0.1699  |
